# Supplementary material for: Arthritic Microenvironment Actuated Nanomotors for Active Rheumatoid Arthritis Therapy
Source: PubMed Central journal article supplement (PMC9896045; doi:10.1002/advs.202204881), 2022-11-14
Supplement: ADVS-10-2204881-s003.pdf [file ADVS-10-2204881-s003.pdf]

## Supporting Information

for *Adv. Sci.*, DOI 10.1002/adv.202204881

Arthritic Microenvironment Actuated Nanomotors for Active Rheumatoid Arthritis Therapy

Cong Xu, Yuejun Jiang, Hong Wang, Yuxin Zhang, Yicheng Ye, Hanfeng Qin, Junbin Gao, Qing Dan, Lingli Du, Lu Liu, Fei Peng\*, Yingjia Li\* and Yingfeng Tu\*

## Supporting Information

## Arthritic Microenvironment Actuated Nanomotors for Active Rheumatoid Arthritis Therapy

Cong Xu, Yuejun Jiang, Hong Wang, Yuxin Zhang, Yicheng Ye, Hanfeng Qin, Junbin Gao, Qing Dan, Lingli Du, Lu Liu, Fei Peng\*, Yingjia Li\* and Yingfeng Tu\*

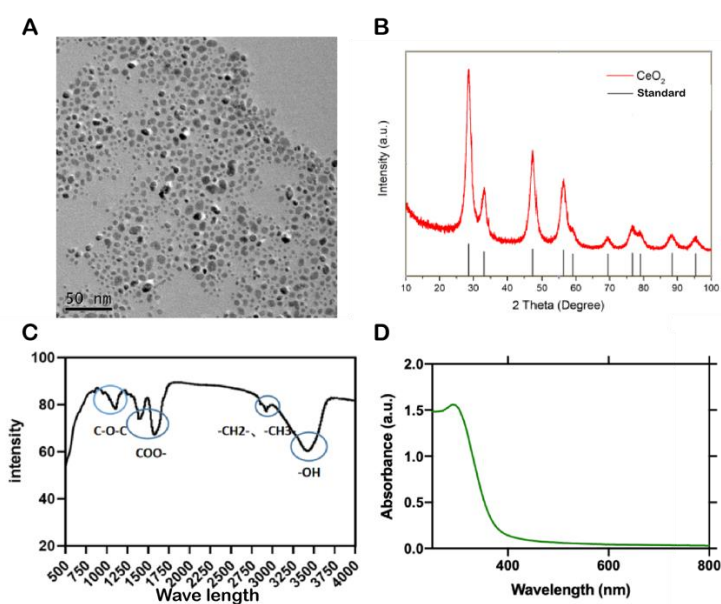

**Figure S1.** Characterization of ceria NPs. (A) TEM image of ceria NPs. (B) X-ray powder diffraction of ceria NPs. (C) infrared spectrum of ceria NPs. (D) UV-vis spectra of ceria NPs.

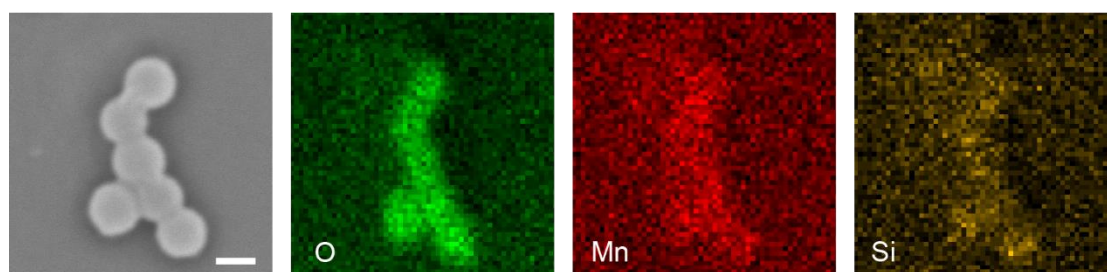

**Figure S2.** SEM image of MnO<sub>2</sub>-motor, and the corresponding element mapping of O, Mn and Si respectively. Scale bar=200  $\mu$ m.

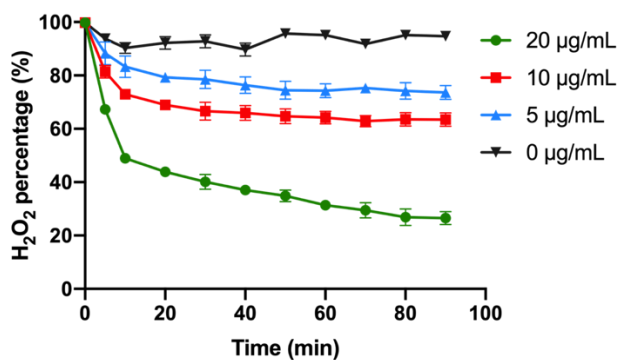

**Figure S3.**  $\text{H}_2\text{O}_2$  degradation curves in the presence of  $\text{MnO}_2$ -motors under 2.5 mM  $\text{H}_2\text{O}_2$  solution ( $n = 4$ ; mean  $\pm$  SD).

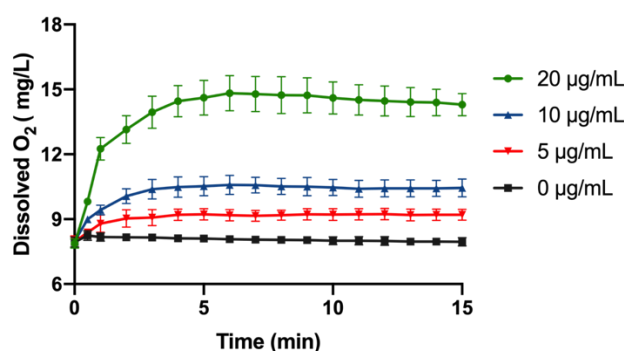

**Figure S4.**  $\text{O}_2$  generation of  $\text{MnO}_2$ -motors with different concentrations in 100 mM  $\text{H}_2\text{O}_2$  solution ( $n = 4$ ; mean  $\pm$  SD).

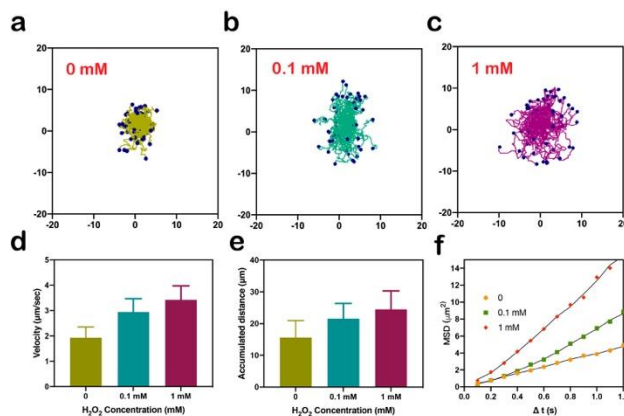

**Figure S5.** (a-c) Enhanced diffusion of  $\text{MnO}_2$ -motors under SSF at different  $\text{H}_2\text{O}_2$  concentrations. (d) Velocity of  $\text{MnO}_2$ -motors. (e) Accumulated distance of  $\text{MnO}_2$ -motors. (f) MSD curve of  $\text{MnO}_2$ -motors. The motion of nanomotors was analyzed with ImageJ for 10 s ( $n = 52$ ).

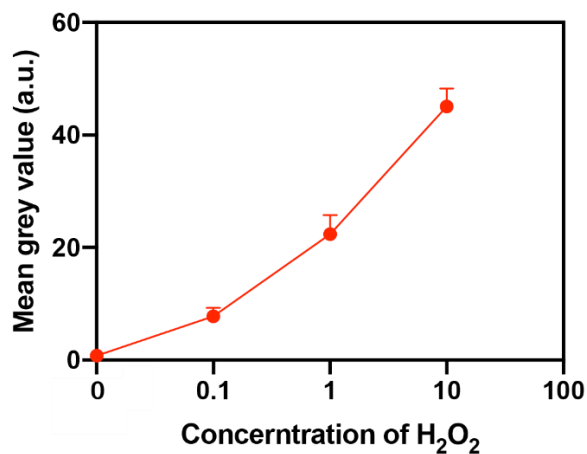

**Figure S6.** The change of mean gray value of the *in vitro* images measured by Image J. (n = 3; mean ± SD)

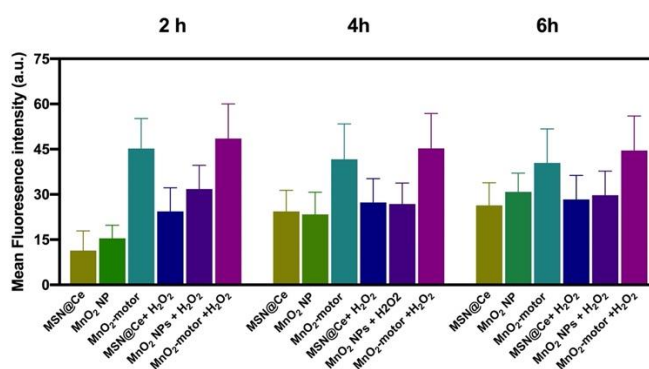

**Figure S7.** Mean fluorescence intensity of RAW264.7 cells after incubating with MnO<sub>2</sub>-motors (n = 3; mean ± SD).

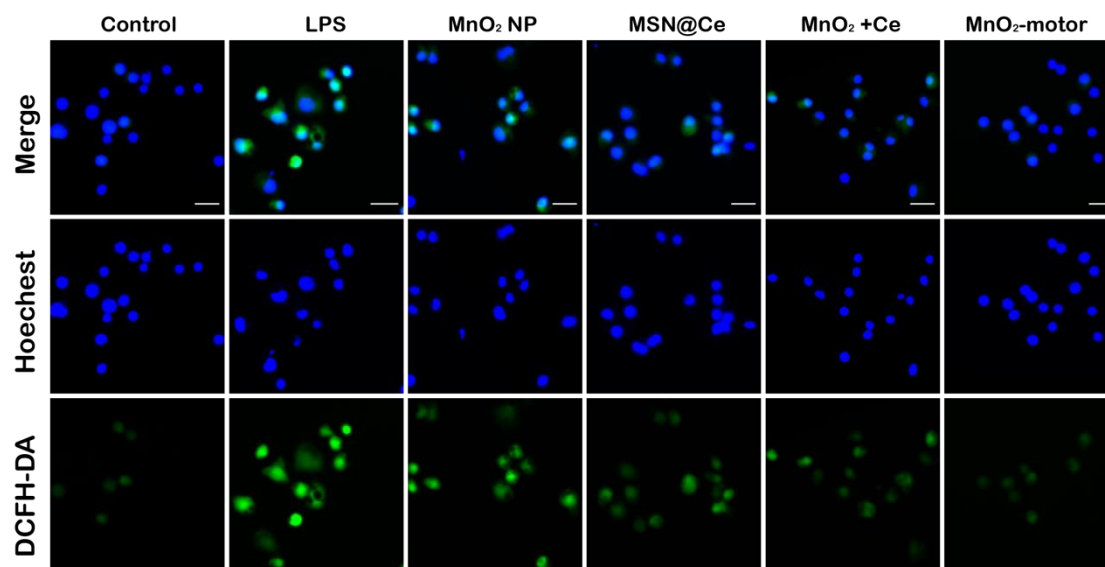

**Figure S8.** Inverted fluorescence microscopy images of ROS in RAW264.7 cells probed by DCFH-DA. Scale bar=50 μm.

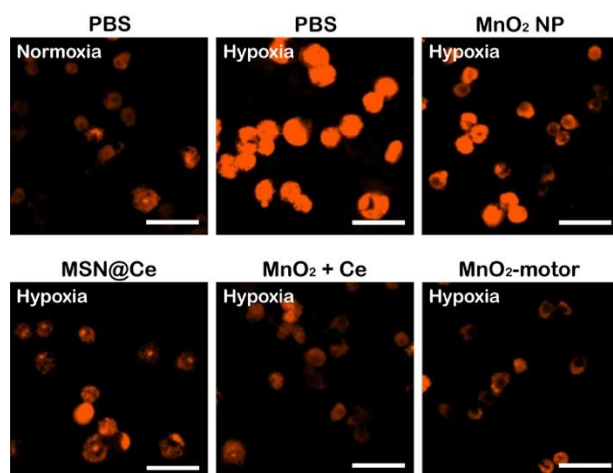

**Figure S9.** Inverted fluorescence microscopy images of O<sub>2</sub> indicator in RAW264.7 cells. Scale bar=50 μm.

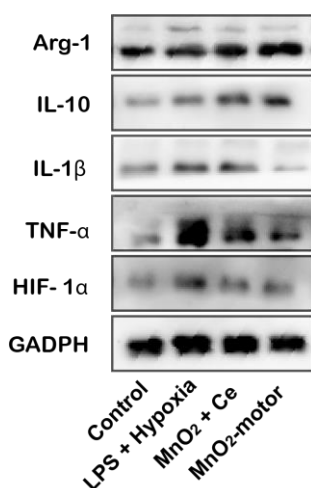

**Figure S10.** Protein expression of HIF-1 $\alpha$ , M1 (IL-1 $\beta$  and TNF- $\alpha$ ), and M2 (Arg-1 and IL-10) macrophage markers in RAW264.7 cells after different treatments, as evaluated by Western blot analysis.

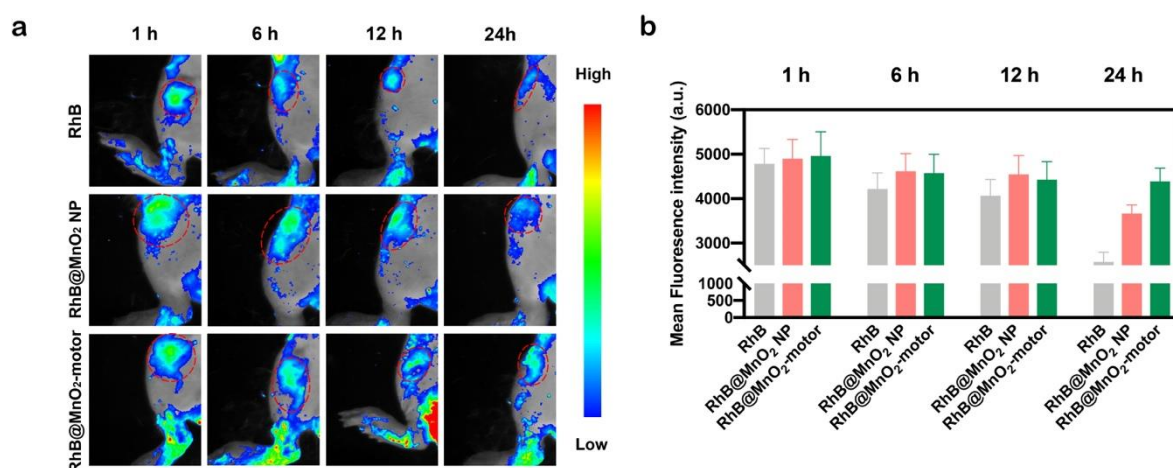

**Figure S11.** (a) Distribution of Rhodamin B-labeled  $\text{MnO}_2$ -motors in joints compared with free Rhodamin B and Rhodamin B-labeled  $\text{MnO}_2$  NP. (b) Fluorescence intensity of  $\text{MnO}_2$ -motors in joints.

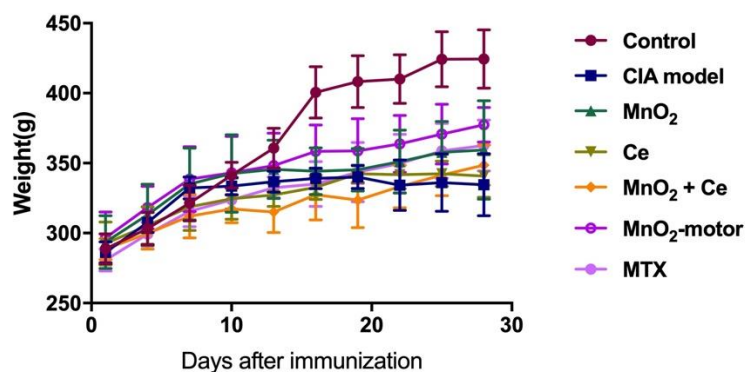

**Figure S12.** Weight changes of rats after different treatments ( $n = 5$ ; mean  $\pm$  SD)

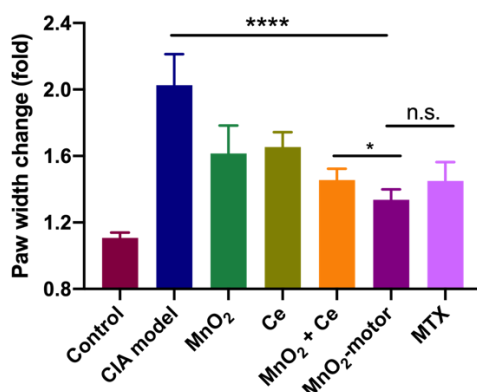

**Figure S13.** Paw width change of rats after different treatments ( $n = 5$ ; mean  $\pm$  SD) (one-ANOVA test).

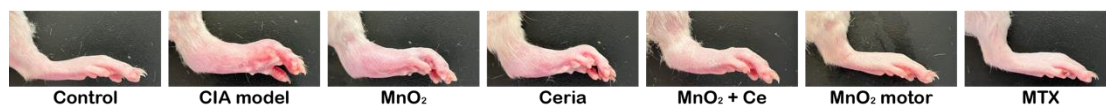

**Figure S14.** Representative photographs of hind legs taken on the 28<sup>th</sup> day.

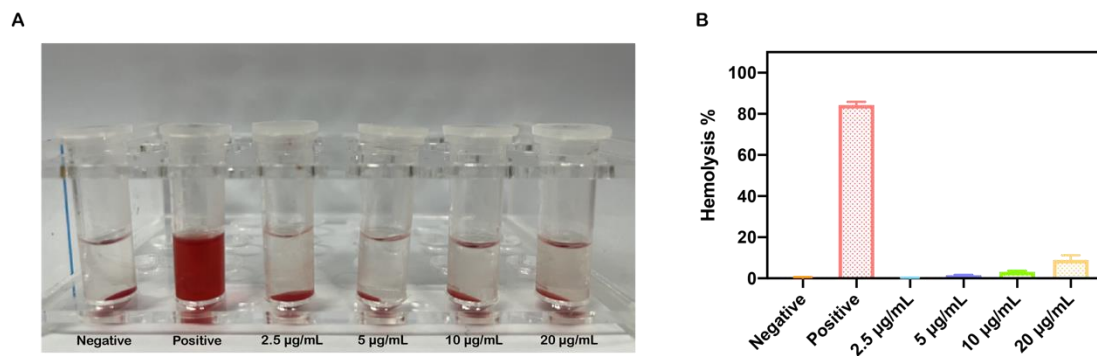

**Figure S15. Hemolysis assay of MnO<sub>2</sub>-motor.** (A) Photographs and (B) hemolysis assay of negative, positive and MnO<sub>2</sub>-motor with different concentrations (n = 3; mean ± SD).

**Movie S1.** Motion of MnO<sub>2</sub>-motors in H<sub>2</sub>O<sub>2</sub> solution with different concentrations. (MP4)

**Movie S2.** In vitro O<sub>2</sub> generation of MnO<sub>2</sub>-motors under H<sub>2</sub>O<sub>2</sub> solution with different concentrations. (MP4)

**Movie S3.** Ultrasound detection of a CIA joint as compared with a normal joint. (MP4)
